1 Unique transcriptional signatures of sleep loss across independently evolved cavefish  
2 populations

3

4 Suzanne E. McGaugh<sup>1</sup>, Courtney N. Passow<sup>1</sup>, James Brian Jaggard<sup>2</sup>, Bethany A. Stahl<sup>2</sup>, Alex C.  
5 Keene<sup>2</sup>

6

7 *<sup>1</sup>Ecology, Evolution, and Behavior, 140 Gortner Lab, 1479 Gortner Ave, University of*  
8 *Minnesota, Saint Paul, MN 55108*

9

10 *<sup>2</sup>Department of Biological Sciences, Florida Atlantic University, 5353 Parkside Drive, Jupiter,*  
11 *FL 33458*

12

13 *Corresponding author: [smcgaugh@umn.edu](mailto:smcgaugh@umn.edu)*

14

15 **Abstract**

16 Animals respond to sleep loss with compensatory rebound sleep, and this is thought to be critical  
17 for the maintenance of physiological homeostasis. Sleep duration varies dramatically across  
18 animal species, but it is not known whether evolutionary differences in sleep duration are  
19 associated with differences in sleep homeostasis. The Mexican cavefish, *Astyanax mexicanus*,  
20 has emerged as a powerful model for studying the evolution of sleep. While eyed surface  
21 populations of *A. mexicanus* sleep approximately eight hours each day, multiple blind cavefish  
22 populations have converged on sleep patterns that total as little as two hours each day, providing  
23 the opportunity to examine whether the evolution of sleep loss is accompanied by changes in  
24 sleep homeostasis. Here, we examine the behavioral and molecular response to sleep deprivation  
25 across four independent populations of *A. mexicanus*. Our behavioral analysis indicates that  
26 surface fish and all three cavefish populations display robust recovery sleep during the day  
27 following nighttime sleep deprivation, suggesting sleep homeostasis remains intact in cavefish.  
28 We profiled transcriptome-wide changes associated with sleep deprivation in surface fish and  
29 cavefish. While the total number of differentially expressed genes was not greater for the surface  
30 population, the surface population exhibited the highest number of uniquely differentially  
31 expressed genes than any other population. Strikingly, a majority of the differentially expressed  
32 genes are unique to individual cave populations, suggesting unique expression responses are  
33 exhibited across independently evolved cavefish populations. Together, these findings suggest  
34 sleep homeostasis is intact in cavefish despite a dramatic reduction in overall sleep duration.

35

36

37

## 38 Introduction

39 Sleep is regulated by homeostatic drive and circadian gating (Archer & Oster, 2015;  
40 Borbély, Daan, Wirz-Justice, & Deboer, 2016). Homeostatic sleep pressure increases throughout  
41 the day for diurnal animals, while circadian drive aligns periods of rest and activity with light-  
42 dark cycles (Archer & Oster, 2015; Borbély et al., 2016). Acute or chronic sleep loss induces  
43 recovery sleep, suggesting the presence of a sleep homeostat. While the presence of a rebound in  
44 response to sleep deprivation has been described in animals ranging from jellyfish to humans  
45 (Anafi, Kayser, & Raizen, 2018; Keene & Duboue, 2018; Libourel et al., 2018; Nath et al.,  
46 2017), surprisingly little is known about the molecular basis of this homeostat and even less is  
47 known about resiliency of different genotypes to insufficient sleep (Diessler et al., 2018).  
48 Further, it is unclear whether the genetic differences that underlie the robust differences in sleep  
49 duration are linked to sleep homeostasis or resiliency to insufficient sleep (Keene & Duboue,  
50 2018).

51 Understanding the functional relationship between sleep duration, homeostasis, and  
52 resiliency to insufficient sleep would be aided by investigating the relationship between evolved  
53 sleep loss and sleep homeostasis. The Mexican tetra, *Astyanax mexicanus*, has emerged as a  
54 leading model for investigating the evolution of sleep (Jaggard et al., 2017; Jaggard et al., 2018;  
55 Keene, Yoshizawa, & McGaugh, 2015). *Astyanax mexicanus* are a single species consisting of  
56 eyed surface fish that inhabit the rivers of northeast Mexico and Texas and at least 30  
57 populations of conspecific blind, cave-dwelling fish (Bradic et al., 2012; Coghill et al., 2014;  
58 Espinasa, Rivas-Manzano, & Pérez, 2001; Herman et al., 2018). Several independent origins of  
59 the cave phenotype arose within the past ~200k years and effective population sizes of  
60 independent caves suggest that selection may be an efficient force in shaping cave-derived traits  
61 (Bradic et al., 2012; Coghill et al., 2014; Herman et al., 2018). Sleep is reduced compared to  
62 surface fish in five cave populations studied to date, suggesting the evolutionary convergence on  
63 sleep loss (Duboué, Keene, & Borowsky, 2011; Jaggard et al., 2018; Yoshizawa et al., 2015).  
64 Further, distinct neural mechanisms lead to sleep loss between populations, indicating sleep loss  
65 evolved independently in different cavefish populations (Jaggard et al., 2017; Jaggard et al.,  
66 2018).

67 Despite this headway in understanding the evolution of sleep duration, the relationship  
68 between changes in evolved sleep duration, homeostasis, and cognition and physiological

69 resiliency to insufficient sleep is unclear. Previously, it was reported that one cavefish population  
70 displayed a rebound following deprivation and the other tested populations approached  
71 significance (Duboué et al., 2011). Given the robust evolutionary changes in sleep duration  
72 across populations, it is not clear whether rebound sleep in cavefish is dependent on shared or  
73 divergent molecular mechanisms from surface fish. Here, we employ a new method of acute  
74 sleep deprivation and find surface fish and three cavefish populations display robust sleep  
75 rebound following a single night of deprivation.

76 A recently sequenced genome in *A. mexicanus* allows for genome-wide analysis of  
77 context-dependent changes in gene-expression (McGaugh et al., 2014). While transcriptomic  
78 approaches have been used to identify developmentally-specified changes in gene expression in  
79 *A. mexicanus* (Gross, Furterer, Carlson, & Stahl, 2013; Hinaux et al., 2013; Stahl & Gross), they  
80 have not been applied to identify novel regulators of behavior. The power of comparing between  
81 independent populations of cavefish with robust differences in sleep behavior, allows for  
82 investigation of mechanisms underlying sleep homeostasis as well as physiological and  
83 metabolic responses to sleep deprivation.

84 Here we compare the behavioral and molecular signatures of sleep deprivation in surface  
85 fish and three populations of cavefish. We find that recovery sleep is maintained in cavefish  
86 populations despite robust evolutionary loss of sleep duration in undisturbed conditions.  
87 Transcriptome analysis revealed unique signatures of sleep deprivation suggesting distinct  
88 responses to insufficient sleep across all populations.

89

## 90 **Methods**

### 91 Animal Husbandry

92 Animal husbandry was carried out as previously described (Borowsky, 2008), and all protocols  
93 and procedures for this experiment were approved by the IACUC Florida Atlantic University  
94 (Protocols A16-04 and A17-32). Fish were housed in the Florida Atlantic University core  
95 facilities at  $23 \pm 1^\circ\text{C}$  constant water temperature throughout rearing for behavior experiments  
96 (Borowsky, 2008). Lights were kept on a 14:10 hr light-dark cycle that remained constant  
97 throughout the animal's lifetime. Light intensity was kept between 25–40 Lux for both rearing  
98 and behavior experiments. All fry were housed in 250 mL pyrex dishes (0-10 dpf, days post  
99 fertilization) or 1L tanks (11-30 dpf) and fed *Artemia* twice daily.

100

### 101 Sleep deprivation

102 We conducted the behavioral and RNA-seq experiments with three different cave  
103 populations: Pachón, Tinaja, and Molino and one surface population. Surface and cave fry at 30  
104 dpf exhibit differences in sleep duration and architecture (Duboué et al., 2011; Jaggard et al.,  
105 2018), thus this is an appropriate stage to assay for variation in sleep rebound. Sleep deprivation  
106 was performed by placing fish in 250mL Erlenmeyer flasks on a VWR 2500 multi-vortexer with  
107 settings of “4” for speed and “2” for duration. Approximately 20 fry per treatment and  
108 population aged 29 dpf were shaken at random intervals < 60 seconds apart since the behavioral  
109 definition of sleep is a quiescent period of 60 seconds or more (Duboué, Borowsky, & Keene,  
110 2012; Yoshizawa, 2015). This deprivation paradigm lasted throughout the night hours between  
111 ZT14-24 on the night before fish were placed into wells for behavioral recordings the following  
112 day. Control animals were held under similar conditions as sleep deprived animals but were not  
113 shaken.

114

### 115 Sleep behavior analysis

116 sleep deprivation treatment consisted of shaking beakers of fish randomly, at a consistent  
117 speed one time per minute throughout a period of 10 hours during the night (ZT 14-24 8pm to  
118 6am). Starting at ZT14, fish in the sleep deprivation treatment were shaken in 200 ml beakers,  
119 followed by immediate transfer to 12-well tissue culture plates (BD Biosciences). Control fish  
120 were housed under identical conditions but were not shaken. Sleep behavior was recorded in  
121 juvenile fish aged 30dpf as previously described (Jaggard et al., 2017; Jaggard et al., 2018).  
122 Recording chambers were lit with custom infrared LEDs placed beneath the fish (Jaggard et al.,  
123 2019). Videos were recorded using VirtualDub software (v 1.10.4) and were analyzed using  
124 Ethovision XT 9.0. All water chemistry was monitored and maintained at standard conditions.  
125 Ethovision tracking parameters were set as previously described, and data was processed using  
126 custom Perl and Excel scripts (Jaggard et al., 2017; Yoshizawa, 2015). All behavioral recordings  
127 were started at ZT0 and recorded for 24 hours. Fish were fed at the start of the behavioral  
128 analysis (ZT0). For each treatment and population, 18 fish were analyzed.

129

### 130 Sample collection for RNA-seq after sleep deprivation

131 RNA-seq samples were collected from *Astyanax mexicanus* that had been reared in the  
132 Keene laboratory at Florida Atlantic University for multiple generations. We conducted the  
133 experiment with the same three different cave populations and surface population that were used  
134 for the behavioral experiment. Surface parental fish were derived from wild-caught Río Choy  
135 stocks originally collected by William Jeffery. Cavefish stocks were Pachón #20, Tinaja 51, and  
136 Molino 187.

137 To minimize non-specific variation, all individuals from each population were collected  
138 from the same population-specific clutch (Pachón cave: fertilized from a mating cluster of six  
139 parents, Molino cave: from a mating cluster of eight parents, Tinaja cave: from a mating cluster  
140 of three parents, Río Choy surface: from a mating cluster of eight parents). Individuals from each  
141 population were raised for 27 dpf under standard conditions, (14:10 light-dark cycle), and three  
142 days prior to the experiment, fish were transferred into dishes with 12-21 fish per dish in a 14:10  
143 light-dark cycle. Fish were fed ad libitum twice daily in the morning and evening. On days that  
144 were non-experiment days, feedings were within a 2-3h window to prevent fish from becoming  
145 food-entrained. On experiment days, fish were fed at Zeitgeber time 0 and 12 and were fasted  
146 overnight.

147 As described above, the sleep deprivation treatment consisted of shaking beakers of fish  
148 randomly, at a consistent speed one time per minute throughout a period of 10 hours during the  
149 night (ZT 14-24, 8pm to 6am). Fish were collected at ZT24 when fish were 30dpf. All  
150 individuals were immediately flash frozen in liquid nitrogen upon collection, and stored at -80°C  
151 (Figure 1).

152 For the Molino and Pachón populations, control fish were from a spawning of the same  
153 parental fish as sleep deprived fish and were exactly 30dpf when sampled, however they were  
154 sampled from a clutch that was spawned approximately a week after the sleep deprived treatment  
155 fish. We sampled control fish on the same day of as the sleep deprivation fish, but due to a  
156 technical error, we could only sequence one control individual from Molino and Pachón from the  
157 same sampling day as the sleep deprived fish. We used this single control sample from Molino  
158 and Pachón to determine whether collection days drove a substantial amount of variation. MDS  
159 plots revealed that there was little difference between these two sampling times (Figure S1).

160

161 RNA extraction, library preparation and sequencing

162 Protocols for RNA extraction, library preparation, and sequencing were performed as  
163 previously described (Passow et al., 2019). To isolate RNA, whole 30dpf fry (~ 30 mg of tissue)  
164 were homogenized and then lysed. Total RNA was extracted using the Qiagen RNeasy Plus  
165 Mini Kit (Qiagen) and then quantified (ng/uL) using NanoDrop Spectrophotometer (Thermo  
166 Fisher Scientific), Ribogreen assay (Thermo Fisher Scientific), and Bioanalyzer RNA 6000 Nano  
167 assay (Agilent). All individuals were extracted within a week by same researcher. The extraction  
168 batch was randomized across populations and treatments (Table S1).

169 All cDNA libraries were constructed at the University of Minnesota Genomics Center on  
170 the same day in the same batch, and 400ng of total RNA was used for mRNA isolation and  
171 cDNA synthesis. Strand-specific cDNA libraries were then constructed using TruSeq Nano  
172 Stranded RNA kit (Illumina), following manufacturer protocol. Before libraries were pooled for  
173 sequencing, library quality was assessed using Agilent DNA 1000 assay on a Bioanalyzer. Only  
174 two samples exhibited RIN scores < 9 from the extracted total RNA (Table S1).

175 To minimize sequencing lane effects, barcoded libraries were pooled with treatment and  
176 population spread evenly between lanes. Samples were sequenced across multiple lanes of an  
177 Illumina HiSeq 2500 to produce 125-bp paired-end reads at University of Minnesota Genomics  
178 Center (Table S1). Little variation was explained by extraction batch or lane of sequencing  
179 (Passow et al., 2019). All sequence data were deposited in the short read archive (Table S1).

180

### 181 Gene expression quantification

182 The pipelines used to filter and quantify patterns of differential expression were similar to  
183 previous published work (Passow et al., 2019), with minor adjustments. In brief, the raw RNA-  
184 seq reads were quality checked using Fastqc (Andrews, 2014) and then trimmed to remove  
185 adapters and poor quality reads using the program Trimmomatic v0.33 (Bolger, Lohse, &  
186 Usadel, 2014). Trimmed reads were then mapped against the *Astyanax mexicanus* Pachón  
187 reference genome (version 1.0.2; GenBank Accession Number: GCA\_000372685.1; McGaugh et  
188 al., 2014) using the splice-aware mapper STAR (Dobin et al., 2013). Stringtie v1.3.3d (Pertea et  
189 al., 2016; Pertea et al., 2015) was used to quantify the number of reads mapped to each gene in  
190 the reference *A. mexicanus* genome annotation. Finally, to generate the counts matrix, we used  
191 the python script provided with Stringtie (prepDE.py; Pertea et al., 2016). Annotations were

192 extracted from the *Astyanax mexicanus* annotation file from Ensembl  
193 (*Astyanax\_mexicanus.AstMex102.91.gtf*).

194

#### 195 Variation in gene expression

196 For quality control, each gene was required to have greater than two counts per million  
197 (cpm) and to have counts data for three or more individuals across the sleep deprivation and  
198 control samples for all populations. This resulted in 17,187 genes that were analyzed. We  
199 identified genes that showed the largest difference in observed gene expression between sleep  
200 deprived and standard conditions using the Bioconductor package, EdgeR (Robinson, McCarthy,  
201 & Smyth, 2010). We used the calcNormFactors command on our DGEList, and generated  
202 multidimensional scaling plots of the top genes using the gene selection method “common.”  
203 Given tagwise dispersion and a design matrix, we used glmFIT to fit a negative binomial GLM  
204 for each tag and DGEGLM object to perform likelihood ratio test based on the contrast matrix of  
205 comparisons. To perform a principal component analysis, we also utilized the log-cpm values of  
206 the counts data with the function prcomp(). P-values for differential expression were adjusted  
207 based on the Benjamini-Hochberg algorithm, using a default false discovery rate of 0.05 (Love *et*  
208 *al.* 2014). Genes were labeled as differentially expressed if the Benjamini-Hochberg adjusted P-  
209 value was less than 0.05 (Tables S2-S5). Log<sub>2</sub>(Sleep deprived/standard) values were calculated  
210 with DESeq2 and exported for further analysis.

211

#### 212 Annotation of differentially expressed genes

213 We conducted annotation analyses using differentially expressed genes at the 0.05 false  
214 discovery rate using PANTHER analysis (Mi *et al.* 2016)  
215 (<http://pantherdb.org/tools/compareToRefList.jsp>). PANTHER analysis was run using only 1:1  
216 orthologs between zebrafish and *Astyanax* with database current as of 2018-12-03. Within the  
217 PANTHER suite, we used PANTHER v14.0 overrepresentation tests (i.e., Fisher’s exact tests  
218 with FDR multiple test correction) with the Reactome v65, PANTHER proteins, GoSLIM, GO,  
219 and PANTHER Pathways. The target list was the zebrafish genes that were 1:1 orthologs to  
220 differentially expressed *Astyanax* genes, and the background list was the 1:1 zebrafish orthologs  
221 of *Astyanax* genes analyzed for differential expression.

222



## 223 Selection analyses

224 We cross-referenced differentially expressed genes to genes likely under selection using the  
225 same analysis metrics detailed in (Herman et al., 2018; Yoshizawa et al., 2018). For population  
226 genomic measures, we included a core set of whole genome resequenced samples which  
227 contained: Pachón cave, N = 10 (9 newly resequenced + the reference reads mapped back to the  
228 reference genome); Tinaja cave, N = 10; Molino cave, N = 9; Rascon surface, N = 6; and Río  
229 Choy surface, N = 9. We required six or more individuals have data for a particular site. For all  
230 population genomic measures, we excluded masked repetitive elements, indels (if present in any  
231 of the core set of samples), and 10bp surrounding the bases affected by each indel by using the  
232 `masking_coordinates.gz` file available for the *Astyanax mexicanus* genome v1.0.2 through NCBI  
233 genomes FTP.

234 Our procedures for outlier analyses have been described (Yoshizawa et al., 2018), but we  
235 briefly recap here. We used hapFLK v1.3 <https://forge-dga.jouy.inra.fr/projects/hapflk> (Fariello  
236 et al., 2013) for genome-wide estimation of the hapFLK statistic of across all 44 *Astyanax*  
237 *mexicanus* samples and two *Astyanax aeneus* samples. HapFLK accounts for hierarchical  
238 population structure by building local ancestry trees and detects changes in haplotype  
239 frequencies which exceed what is expected for neutral evolution (Fariello et al., 2013). HapFLK  
240 outperformed many other statistics (Schlamp et al., 2016) and may be robust to bottlenecks and  
241 migration. We augment this measure with metrics of  $F_{ST}$ ,  $\pi$ , and  $d_{XY}$ . We also required that  $\pi$  that  
242 was not excessively low in the two surface populations, Rascon and/or Río Choy, (rank of  
243 greater than 500 for dense ranking of genes or lowest ~2.5% of diversity values in the genome)  
244 to protect, in part, against calling outliers from inflated relative measures of divergence that were  
245 driven by low diversity due to low recombination or sweeps in the surface population. As we are  
246 interested in identifying genes under strong selective sweeps in the cave populations, we did not  
247 want to exclude genes with low diversity in cave populations.  $F_{ST}$  is more sensitive to changes in  
248 allele frequency than absolute measures such as  $d_{XY}$  (Cruickshank & Hahn, 2014).

249

## 250 **Results**

251 To identify expression signatures of sleep deprivation, we performed RNA-seq on surface fish  
252 and three populations of cavefish. At 29dpf fish were sleep deprived for 10hrs by mechanical

253 shaking shown to elicit sleep rebound. Fry were sampled for behavioral sleep rebound and RNA-  
254 seq at 30dpf.

255

### 256 Sleep homeostasis behavioral assays

257 To quantify sleep homeostasis across *A. mexicanus* populations, we sleep deprived fish  
258 throughout the night period (ZT14-24) and compared sleep the following day to undisturbed  
259 controls (Figure 2A). Surface fish, as well as Pachón, Molino, and Tinaja cavefish displayed a  
260 significant increase in daytime sleep following deprivation suggesting sleep homeostasis is intact  
261 in all three cavefish populations (Figure 2B, D-G). When sleep measurements were extended  
262 into the night following deprivation (ZT14-24), total sleep duration did not differ between  
263 control and sleep deprived fish across all four populations tested (Figure 2C, D-G), suggesting  
264 the recovery sleep during the day was sufficient to return sleep drive to levels in undisturbed  
265 fish. Taken together, these findings reveal sleep homeostasis is intact across three populations of  
266 cavefish, despite exhibiting robustly diminished basal sleep levels.

267

### 268 Mapping statistics

269 On average we sequenced 16.72 million reads per sample (median = 16.77 million, min = 13.36,  
270 max = 19.88) from whole, individuals at 30 dpf (Table 1, Table S1, Supplemental materials).  
271 Pachón cavefish exhibited slightly higher percentage of reads mapped compared to all other  
272 populations, as would be expected given reference sequence bias. Total yield of reads were not  
273 significantly different between treatments (Wilcoxon test  $W = 252.5$ ,  $p\text{-value} = 0.4705$ ). On  
274 average, 88.96% reads mapped per sample to the *Astyanax mexicanus* genome (median = 88.9%,  
275 range 85.06% - 91.59%). Filtering of the gene counts matrix to include only transcripts with  
276 greater than two cpm and three or more individuals with counts data resulted in 17,187 genes  
277 used for differential expression analysis and clustering analysis, except where otherwise noted.  
278 Libraries were normalized by size using calcNormFactors (Figure S2), and samples did not  
279 exhibit clustering due to lane of sequencing or extraction batch (Figure S3, S4).

280

### 281 General patterns in expression response to sleep deprivation

282 After correcting for multiple testing, the number of significantly differentially expressed genes  
283 between sleep deprived and control groups is < 2.1% of the 17,187 genes used for differential

284 expression analyses in all populations (Table 1). Multidimensional scaling analysis showed that  
285 the major axis of differentiation among the top 500 genes was ecotype (Figure 3) and explained  
286 33% of the variation, suggesting that expression profiles of cave populations are more similar to  
287 each other than to surface fish. The second principal component accounted for 12% of the  
288 variation in the data and separated the caves into two clusters containing 1) Pachón-Tinaja and 2)  
289 Molino, which represent two separate lineages of cavefish (Herman et al., 2018). Thus, ecotype  
290 and population (and not sleep deprivation treatment) drove the majority of variation in the  
291 complete dataset. Since population is such a strong driver of expression, to isolate the effect of  
292 sleep deprivation on expression profiles, we separated the populations into individual MDS plots  
293 (Figure S5, S6, S7, S8).

294 Across population-specific MDS plots, sleep deprivation treatment accounted for 12-16%  
295 of the variation in the dataset. However, individual populations exhibited different signatures.  
296 Most notably, Pachón cave population exhibits little differentiation between sleep deprived and  
297 control samples (Figure S5) compared to the other populations (Figure S6, S7, S8).

298

### 299 Divergent responses across cave and surface populations in response to sleep deprivation

300 Despite surface fish exhibiting greater than 3-fold longer total sleep than cavefish at this stage of  
301 development (Duboué et al., 2011 and Figure 1), the 10-hour sleep deprivation treatment did not  
302 result in a significant increase in the total number of differentially expressed genes in surface fish  
303 compared to any of the cave populations. Surface fish exhibited ~1.6 and ~2.2 fold the number of  
304 upregulated genes in response to sleep deprivation than Molino and Pachón cavefish,  
305 respectively (Table 1). Surface fish also experienced ~1.5 fold the number of downregulated  
306 genes than Pachón cavefish (Table 1). However, Tinaja cavefish exhibited a greater total number  
307 of upregulated genes than the three other populations (Table 1). Thus, we did not observe a direct  
308 pattern that evolved sleep loss in cave populations results in fewer differentially expressed genes  
309 in response to sleep deprivation, fortifying the behavioral findings that sleep homeostasis is  
310 largely intact in cavefish population.

311 While surface fish did not exhibit more exacerbated transcriptional responses to sleep  
312 deprivation than cavefish, the surface population exhibited the highest number of uniquely  
313 differentially expressed genes than any other population (83.5-86.7%, Table 1), suggesting  
314 surface-specific responses to sleep deprivation. More cave-specific overlap in differentially

315 expressed genes, though, could be because the analyses included more cave populations than  
316 surface populations.

317

### 318 Population-specific changes in response to sleep deprivation

319 Across all cave and surface populations, more differentially expressed genes were found to be  
320 shared than estimated by chance, suggesting a degree of conserved responses to sleep  
321 deprivation. Between cave populations, the number of concordant upregulated and  
322 downregulated genes was significantly greater than random for all comparisons ( $p \ll 0.0001$ ;  
323 Figure 3). Between cave and surface comparisons, there was significant overlap, but to a lesser  
324 degree than in comparisons considering only cave populations ( $p \leq 0.007$ , for all cave-surface  
325 comparisons). As would be expected, the number of genes showing discordant patterns  
326 (upregulated in one population and downregulated in another) was not significantly different  
327 from random for all pairwise-population comparisons ( $p > 0.145$  in all cases). Therefore, across  
328 populations more genes were overlapping in concordant transcriptional response than expected  
329 by chance alone.

330 While the overlap was significantly more than expected by chance, few differentially  
331 expressed genes were shared between populations. For example, between 5.0-7.8% of  
332 differentially expressed genes overlapped in the same direction among pairwise comparisons of  
333 caves, and 1.4-2.4% of differentially expressed genes overlapped across all three cave  
334 populations. While we found significant overlap in expression responses between populations,  
335 67-82% of differentially expressed genes are unique to specific cave populations. This lends  
336 support to the hypothesis that response to sleep deprivation and sleep homeostatic processes may  
337 exhibit strong intraspecies differences among caves.

338

### 339 Functional enrichment analysis

340 Very few functional categories were significantly enriched after correction for false discovery  
341 rate across all populations (FDR; Tables S6-S13). For cave populations, gene ontology analyses  
342 indicated that upregulated genes were significantly enriched for oligopeptide transmembrane  
343 transport activity (Pachón) and intermediate filaments cytoskeleton organization associated with  
344 wound healing (Tinaja). One of the consistently upregulated genes in past mammalian studies of  
345 sleep homeostasis is *activity-regulated cytoskeletal associated protein (arc)* (Diessler et al.,

2018). While this gene is not annotated in any fish genome on Ensembl, it is notable that cytoskeleton-related processes are enriched in genes upregulated in response to sleep deprivation in Tinaja cavefish. Downregulated genes for cave populations were associated with winged helix/forkhead transcription factors in Molino ( $p = 0.054$ , after FDR correction) and nitrogen compound transport in Tinaja. In the surface population, upregulated genes are significantly enriched for transmembrane transport functions of a variety of molecules, but downregulated genes exhibit no significant functional enrichment. The different GO categories for each population support the notion that sleep deprivation evokes variable intraspecific physiological responses across different *A. mexicanus* populations.

355

### 356 Selection analyses

Several differentially expressed genes also exhibit signatures of positive selection (Table S14). Notably, *aif1l* (*allograft inflammatory factor 1 like*) is downregulated in Molino and Pachón cavefish in response to sleep deprivation and exhibited population genetic parameters suggestive of a recent selective sweep in both populations (e.g., significant with HapFLK analyses, in the top 5% of  $F_{ST}$  values across the genome between surface and Molino populations, in the top 10% of  $F_{ST}$  values across the genome between surface and Pachón populations, and one of the least diverse genes across the genome in both cave populations). Knockout mice of *aif1l* exhibited deformities in endocrine/exocrine, hematopoietic, immune, integument, and liver/biliary systems (Dickinson et al., 2016), suggesting a pleiotropic link between extended wakefulness and liver and immune function in cavefish. Next, *slc17a8* is downregulated in Tinaja cavefish in response to sleep deprivation and is involved in equilibrioception, neuromast hair cells, neuron-neuron synaptic transmission, posterior lateral line neuromast hair cell development, startle response, and vestibular reflex (Obholzer et al., 2008). Population genetic parameters of *slc17a8* suggest a recent selective sweep in Tinaja (significant with HapFLK, in the top 5%  $F_{ST}$  outliers between Tinaja cave and Rascon surface, while being among the lowest diversity genes in Tinaja). The down regulation of lateral line components in response to sleep deprivation is especially interesting since sleep duration in at least one cavefish population is restored with the ablation of the lateral line (Jaggard et al., 2017). Our results suggest that dampening signals from the lateral line may be a response to sleep pressure. Interestingly, Pachón cavefish exhibited significant upregulation of the retinal photoreceptor-associated gene *phosphodiesterase 6G* (*pde6gb*) which

377 is highly enriched in the pineal gland relative to the brain of larval and adult zebrafish (Toyama  
378 et al., 2009), suggesting *pde6gb* may play a role in circadian physiology. This gene exhibited  
379 metrics of a recent selective sweep in Pachón (e.g. significant with HapFLK analysis, in the  
380 largest 20% Dxy and largest 5% Fst for Pachón-surface comparisons and exhibits very low  
381 diversity in Pachón). The three cases highlighted here suggest that selection in cave populations  
382 may have shaped liver, lateral line, and photoreceptor functioning, and these traits pleiotropically  
383 impacted sleep phenotypes or vice versa.

384

## 385 **Discussion**

386 While sleep duration is widely studied across animal species, sleep homeostasis and  
387 baseline sleep phenotypes are likely functionally distinct (Anafi et al., 2018; Joiner, 2016; Keene  
388 & Duboue, 2018). A central question is whether the truncated sleep duration that has evolved in  
389 cavefish (Duboué et al., 2011; Jaggard et al., 2018) also impacted sleep homeostasis or whether  
390 these processes are independently regulated. Here we implemented an acute sleep deprivation  
391 treatment to examine the behavioral and molecular effects in surface fish and three  
392 independently-evolved cavefish populations. Our behavioral analysis confirms previous findings  
393 that sleep homeostasis is intact across cavefish populations (Duboué et al., 2011), supporting the  
394 notion that baseline sleep phenotypes are regulated by separate processes from sleep homeostasis  
395 (Allada, Cirelli, & Sehgal, 2017). Sleep significantly deprivation impacted expression of only a  
396 few hundred genes across populations, and different cavefish populations and surface fish exhibit  
397 discordant gene expression responses to the same sleep deprivation treatment. Thus, our results  
398 demonstrate intraspecific variation in molecular mechanisms of sleep pressure in response to  
399 sleep deprivation.

400 Sleep deprivation is an effective way to induce sleep rebound and results in a host of  
401 pathophysiological and cognitive deficits (Cappuccio, D'elia, Strazzullo, & Miller, 2010;  
402 Cedernaes et al., 2018; Leproult, Holmbäck, & Van Cauter, 2014). Our analysis comparing gene  
403 expression in control and sleep deprived fish revealed differential gene expression in only a few  
404 hundred genes in response to sleep deprivation across all populations. However, we observed  
405 three genes that were differentially expressed across all cave and surface populations, indicating  
406 they are part of a generalized response to sleep deprivation: *heat shock protein alpha-crystallin-*  
407 *related*, *b11 (hspb11)* and *neutral cholesterol ester hydrolase 1a (nceh1a)* were upregulated and

408 transcription factor *E74-like factor 3 (elf3)* was downregulated in response to sleep deprivation.  
409 Heat shock proteins and other molecular chaperones are often upregulated after sleep deprivation  
410 as an indicator of cellular stress, suggesting this is an evolutionarily conserved response to sleep  
411 deprivation (Allada et al., 2017; Cedernaes et al., 2018; Mackiewicz et al., 2009; Uyhelji et al.,  
412 2018). *Neutral cholesterol ester hydrolase 1a (nceh1a)* promotes adipogenesis (Homan, Kim,  
413 Cardia, & Saghatelian, 2011), and is strongly implicated in atherosclerotic lesions (Igarashi et al.,  
414 2010; Okazaki et al., 2008), indicating that *nceh1a* may be a candidate for mediating the well-  
415 documented relationships between short sleep duration and advancement of atherosclerosis and  
416 weight gain (Cedernaes et al., 2018; Davies et al., 2014; Levy et al., 2012; Nakazaki et al., 2012).  
417 *E74-like factor 3 (elf3)* is the only gene significantly downregulated in response to sleep  
418 deprivation in all populations. Interestingly, this gene is involved in inflammatory response  
419 (Conde et al., 2016), epithelial cell differentiation (Kwon et al., 2009), and is a cancer gatekeeper  
420 (Gajulapalli et al., 2016; Shatnawi et al., 2014; Yachida et al., 2016; Yeung et al., 2017),  
421 suggesting a molecular link between sleep disruption and increased cancer risk (Blask, 2009;  
422 Haus & Smolensky, 2013). Together, these genes may be conserved factors that are regulated in  
423 accord with sleep drive and deprivation across *A. mexicanus* populations.

424 All genes that were not differentially expressed in the surface population, but were  
425 significantly upregulated across all cave populations were linked to sleep or circadian function.  
426 *Carnitine palmitoyltransferase 1B (cpt1b)* variants are associated with narcolepsy in humans and  
427 upregulated *cpt1b* may increase hypocretin activity (Han et al., 2012; Miyagawa et al., 2008),  
428 consistent with previous work demonstrating that increased hypocretin is highly associated with  
429 short sleep duration in cavefish (Jaggard et al., 2017; Jaggard et al., 2018). *aarF domain*  
430 *containing kinase 5 (adck5)*, was upregulated across all cave populations in response to sleep  
431 deprivation and human variants are associated with insomnia symptoms (Lane et al., 2017).  
432 *Telethonin (tcap)*, a component of cardiac sarcomeres, is regulated by circadian components  
433 CLOCK and BMAL1 (Podobed, Alibhai, Chow, & Martino, 2014), supporting the close  
434 relationship between sleep homeostasis and circadian cycles suggested by other work (Allada et  
435 al., 2017; Borbély et al., 2016). In contrast, none of the genes that were significantly  
436 downregulated in response to sleep deprivation across all caves have direct links to sleep or  
437 circadian function (e.g. *gamma-glutamyl hydrolase-like*, *ETS homologous factor*, or *cathepsin*  
438 *K*), though *transmembrane and coiled-coil domain family 1 (TMCC1)* may potentially be

439 involved in endoplasmic reticulum stress or downregulation of protein synthesis, which are  
440 common responses to sleep deprivation (Mackiewicz et al., 2009) (Zhang et al., 2014).

441 After sleep deprivation, five genes were upregulated in surface fish while being  
442 downregulated in at least one cave population. In contrast, no genes were downregulated in  
443 surface fish while being upregulated in any cavefish population, lending support for the idea that  
444 cavefish may be more resilient to extended wakefulness than surface fish. All genes  
445 downregulated in Molino cavefish and upregulated in surface fish play critical roles in glucose  
446 homeostasis. In mammals, increased expression of *sodium-coupled neutral amino acid*  
447 *transporter 3 (slc38a5)* triggers pancreatic alpha cell proliferation (Kim et al., 2017) which  
448 secrete glucagon to elevate the glucose levels in the blood. In response to sleep deprivation,  
449 surface fish upregulate *slc38a5a*, which is typically upregulated when glucose levels drop and  
450 circulating amino acid levels increase. The ultimate effect of upregulating *slc38a5a* in surface  
451 fish is an expected increase in glucagon and subsequently, elevated circulating glucose levels. In  
452 contrast to surface fish, Molino cavefish downregulate *slc38a5a* in response to sleep deprivation  
453 which would ultimately lead to a decreased in glucagon and subsequently, decreased circulating  
454 glucose levels. Next, *proteinase-activated receptor 2-like (par2b aka f2r11.2)* is involved in a  
455 variety phenotypes, but recent evidence suggests that downregulation of *par2b*, as seen in  
456 Molino cavefish, would result in reduction of generation of glucose from non-carbohydrate  
457 sources (e.g. gluconeogenesis), ultimately leading to a reduction in circulating glucose levels  
458 (Wang et al., 2015). Lastly, knockout *CCAAT/enhancer-binding protein beta-like (cebpb)* mice  
459 exhibit reduced hepatic glucose production through glycogenolysis (Liu et al., 1999), suggesting  
460 that reduced expression in Molino cavefish may result in the reduction of the conversion of  
461 glucagon to glucose. Similar to surface fish, *cebpb* is upregulated in response to sleep  
462 deprivation in rats (Elliott et al., 2014) (Cirelli, Faraguna, & Tononi, 2006) suggesting increased  
463 glucose production. These expression differences are notable as cavefish and surface fish  
464 experience different physiological responses to starvation (Jaggard et al., 2017). Surface fish  
465 implement sleep deprivation upon starvation, presumably to increase time for food searching,  
466 while Molino and Pachón cavefish increase sleep upon starvation, presumably to conserve  
467 energy (Jaggard et al., 2017). Future work should investigate the interplay between sleep  
468 plasticity and starvation, and our expression data suggest that sleep deprivation upon starvation



469 in surface fish will lead to increased circulating glucose, while sleep deprivation in response to  
470 starvation in cavefish would potentially quickly deplete energy stores.

471 Sleep restriction in humans is linked to increased food consumption, weight gain and  
472 obesity, insulin resistance, and type II diabetes (Cedernaes et al., 2018; Rao et al., 2015; Zhu et  
473 al., 2019). Several genes related to glucose homeostasis were upregulated in cave-specific  
474 responses. Genes upregulated in Molino cavefish in response to sleep deprivation included:  
475 *pyruvate dehydrogenase kinase 4 (pdk4)*, which is increased in mouse models of insulin  
476 resistance and type II diabetes (Cedernaes et al., 2018); *carnitine palmitoyltransferase 1b*  
477 (*cpt1b*), which is also involved in insulin resistance; and *leptin receptor*, which is involved in a  
478 variety of metabolic phenotypes including obesity. Likewise, in Tinaja cavefish genes  
479 upregulated in response to sleep deprivation included *insulin receptor substrate 1 (irs1)* and  
480 *solute carrier family 2 member 4 (slc2a4)* which are both strongly associated with glucose  
481 homeostasis. Cavefish populations exhibit intraspecific variation for metabolic phenotypes  
482 across independently evolved cave populations (Aspiras et al., 2015; Riddle et al., 2018), and the  
483 diverse expression changes presented here suggest intraspecific variation in maintaining glucose  
484 homeostasis in response to sleep deprivation.

485 Despite known links between sleep homeostasis and circadian regulation on a molecular  
486 and genetic level, many circadian and sleep-associated genes are not differentially expressed  
487 between fish in the sleep deprivation and control treatments. Little is known about genetic  
488 regulation of sleep homeostasis in *A. mexicanus*, but previous work has documented a number of  
489 factors that regulate circadian cycling of certain transcripts (Beale et al., 2013) and sleep  
490 regulation (Jaggard et al., 2018). For example, Pachón cavefish evolved enhanced levels of the  
491 wake-promoting *hypocretin neuropeptide precursor HCRT*, conferring sleep loss in this  
492 population (Jaggard et al., 2018). At least in part, this phenotype is developmentally regulated as  
493 elevated homeobox transcription factor LHX9 specifies a greater number of HCRT-neurons in  
494 cavefish (Alie et al., 2018). While *HCRT* was not expressed at sufficient levels to be analyzed by  
495 our differential expression analysis, *lhx9* was not differentially expressed after sleep deprivation  
496 across any of the populations examined, supporting the notion that different molecular processes  
497 regulate sleep duration under standard conditions and sleep homeostasis. In addition, a number  
498 of genes previously identified as regulating sleep in zebrafish and mammals are also not  
499 differentially expressed for any tetra population in response to sleep deprivation, despite being

500 conserved signaling molecules in sleep regulation across the animal phylogeny. These include  
501 *aanat2*, an important enzyme for the production of melatonin, gaba receptors (*gabarapa*,  
502 *gabarapl2*), brain derived neurotrophic factor (*bdnf*), adenosine receptors (*adora1a*, *adora1b*,  
503 *adora2a*, *adora2b*), adenosine deaminase (*ada*, *adar*), adenosine kinase (*adka*, *adkb*) (Holst &  
504 Landolt, 2015), NMDA receptors (e.g., *grin* paralogs, *nsmfa*) (Liu, Liu, Tabuchi, & Wu, 2016),  
505 *flotillin* (*flot1*) (Mackiewicz et al., 2007) and dopamine receptors and transporters (*drd1b*, *drd4a*,  
506 *drd4b*, *slc6a3*). Likewise, key clock genes (*clockb*, *per1a*, *per1b*, *per2*, *per3*, *arntl1a*, *arntl1b*,  
507 *cry1aa*, *cry1ab*, *cry1ba*, *cry1bb*, *cry4*, *roraa*, *rorab*, *rorc*), which are often impacted in sleep  
508 deprivation studies (Allada et al., 2017; Archer et al., 2014; Archer & Oster, 2015; Borbély et al.,  
509 2016; Franken, 2013; Möller-Levet et al., 2013; Uyhelji et al., 2018), are all not differentially  
510 expressed for any tetra population. Together, this suggests that genes regulating sleep duration  
511 and circadian function under standard conditions are largely unaffected by a single night of sleep  
512 deprivation in tetras.

513         Several considerations must be taken into account in evaluating our study. First, our  
514 study examined the effect of a single night of sleep deprivation in fish housed on a standard  
515 14:10 light cycle. While the results suggest relatively limited changes in the number of  
516 differentially expressed genes, it is consistent with studies examining the effects of acute sleep  
517 deprivation in other animals. For example, a similar number of genes had altered expression  
518 levels in humans after various levels of sleep deprivation (Aho et al., 2013; Cedernaes et al.,  
519 2018; Pellegrino et al., 2012). We predict that longer-term sleep deprivation for days or chronic  
520 insufficient sleep over a number of days may result in more robust changes in gene expression,  
521 however, these protocols would also be likely to induced generalized stress (Pellegrino et al.,  
522 2012).

523         Second, our study employed whole-body sampling for RNA-seq from mRNA transcripts.  
524 Tissue specific differences are documented to result from sleep deprivation (Cedernaes et al.,  
525 2018) and may obscure signal from specific genes (Diessler et al., 2018). For example, *per2*  
526 expression increases in sleep deprived mice and remains elevated for varied amounts of time  
527 depending on the tissue (Curie, Maret, Emmenegger, & Franken, 2015). At 30dpf, brain  
528 dissection is technically challenging and would likely require pooling across samples. Further,  
529 precise dissection of tissue takes time and would result in the samples collected last being sleep  
530 deprived for longer than the samples collected first.

531 To our knowledge, these findings are the first genome-wide analysis of sleep deprivation  
532 induced changes in fish. In zebrafish, sleep deprivation robustly impacts cellular processes and  
533 behavior (Aho et al., 2017; Elbaz et al., 2017; Pinheiro-da-Silva, Silva, Nogueira, & Luchiari,  
534 2017; Zada et al., 2019), but the effects on large-scale changes in gene expression have not been  
535 investigated. Both zebrafish and *A. mexicanus* provide robust models for the identification of  
536 genetic and pharmacological regulators of sleep (Duboué et al., 2012; Jaggard et al., 2018;  
537 Prober, 2018; Rihel, Prober, & Schier, 2010), suggesting these models can be used to investigate  
538 the genetic architecture associated with sleep loss. Our findings, that sleep deprivation induces  
539 different molecular signatures in each of the four *A. mexicanus* populations tested, raises the  
540 possibility that the response to sleep pressure is highly heterogenous across individuals of the  
541 same species. The application of recently developed gene-editing approaches in *A. mexicanus*  
542 (Ma et al., 2018; Stahl et al., 2019) combined with the behavioral assay described here may  
543 allow for functional validation of these genes and identification of novel regulators of sleep  
544 homeostasis.

545

#### 546 **Acknowledgements**

547 We thank the University of Minnesota Genomics Center for their guidance and performing the  
548 cDNA library preparations and Illumina HiSeq 2500 sequencing. The Minnesota  
549 Supercomputing Institute (MSI) at the University of Minnesota provided resources that  
550 contributed to the research results reported within this paper. Funding was supported by NIH  
551 (1R01GM127872-01 to SEM and ACK) and NSF award IOS 165674 to ACK, and a US-Israel  
552 BSF award to ACK. CNP was supported by Grand Challenges in Biology Postdoctoral Program  
553 at the University of Minnesota College of Biological Sciences. Institutional Animal Care and  
554 Use Committee at Florida Atlantic University (Protocol #A15-32).

555

556

557 **Figure 1.** Sampling schematic. We sampled three cave populations: Tinaja, Pachón, and Molino  
558 and one surface population at 30 days post fertilization. Fish were sleep deprived for 10hrs  
559 during their normal dark period through intermittent shaking.  
560

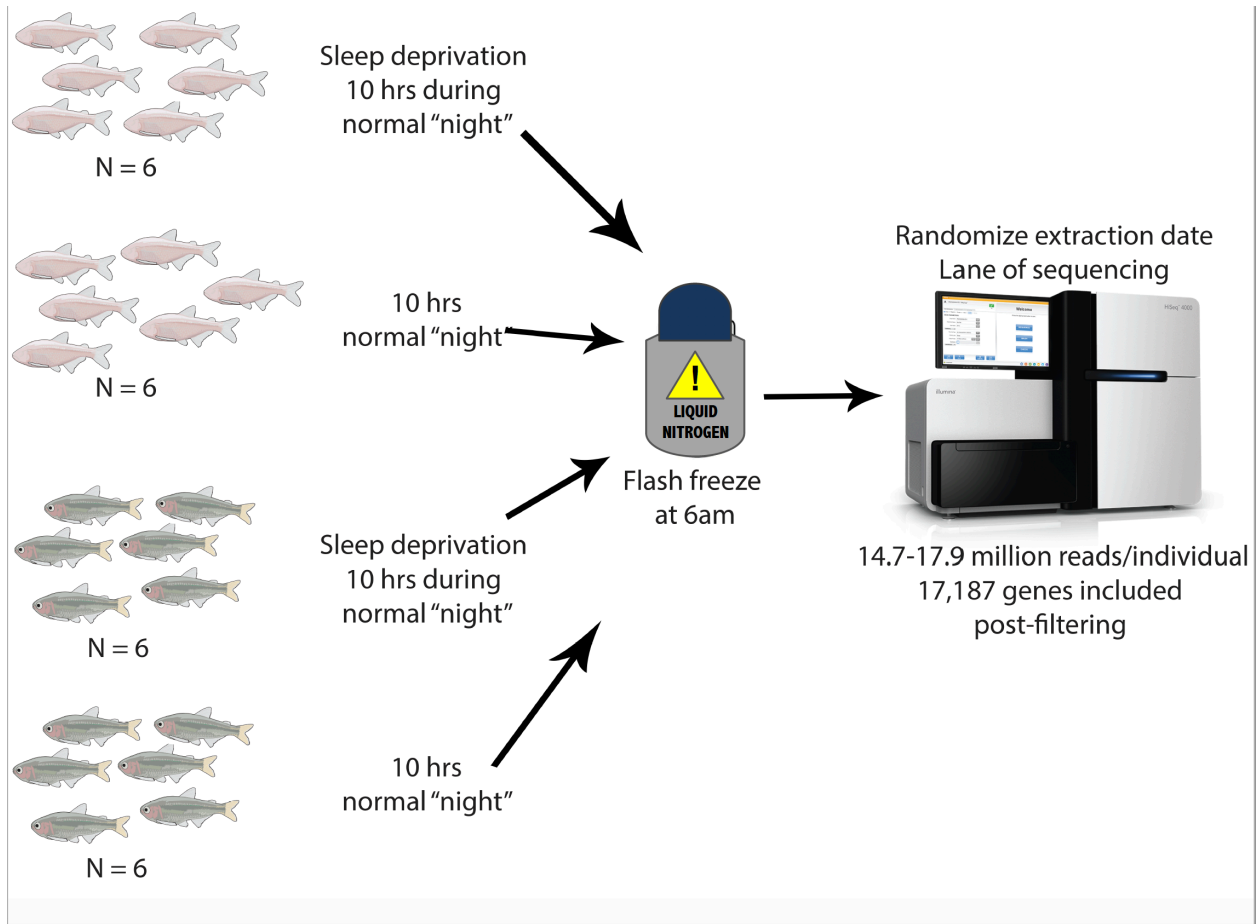

561  
562

563 **Figure 2. A)** Following 14hrs of acclimation, fish were sleep deprived for 10 hours (red line)  
564 during the night and behavior was measured over the following 24 hrs. **B)** All four groups of  
565 sleep deprived fish (grey) slept significantly more than undisturbed controls (white) during the  
566 14hrs of daytime sleep following deprivation due to longer sleep bouts. **C)** No differences in  
567 sleep duration were detected between group during the 10 hrs of night following deprivation.  
568 Sleep profiles for **D)** surface, **E)** Pachón, **F)** Tinaja, and **G)** Molino over the day following  
569 deprivation. Color lines denote sleep derived fish, black lines represent undisturbed controls.  
570 Grey represents standard error of the mean.  
571

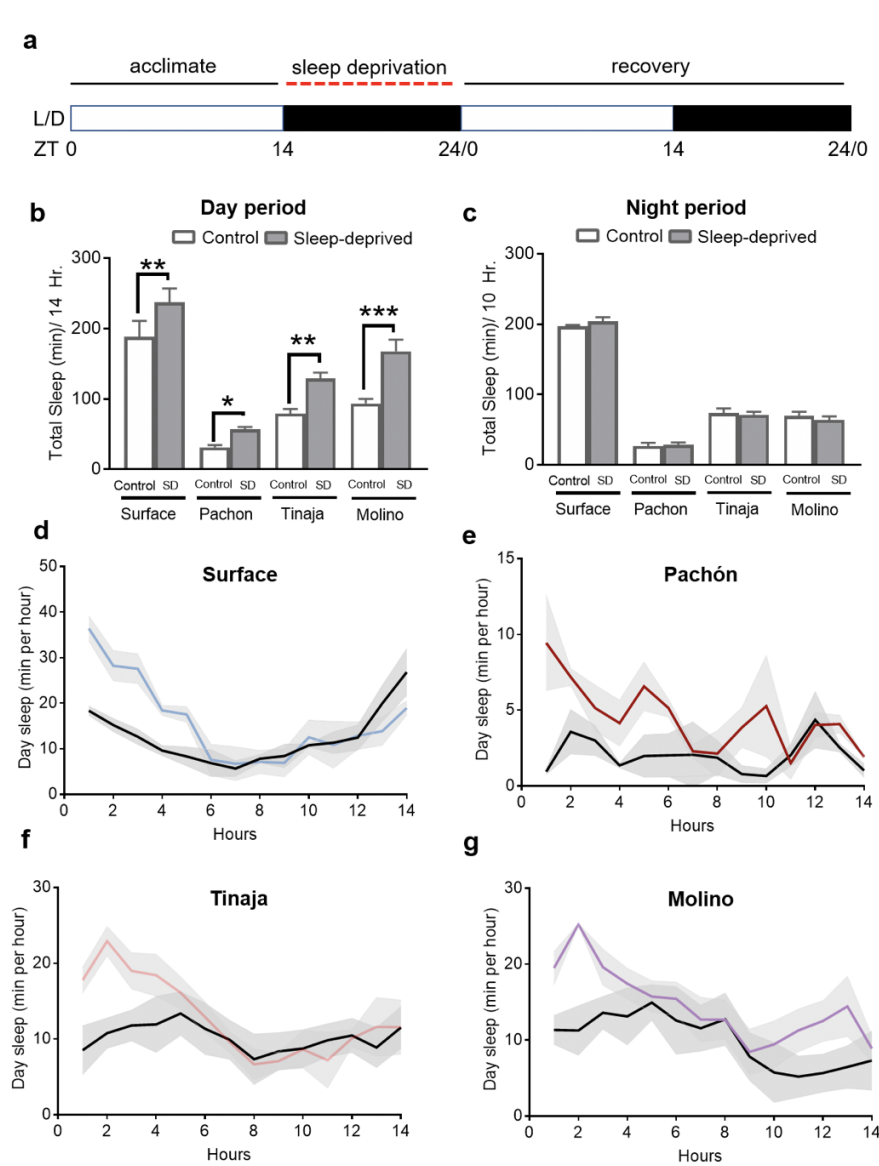

572 **Figure 3. A)** MDS plot of 500 Top genes between control and sleep deprivation treatments the  
 573 four populations normalized for library size. PC1 clearly demarcates population of origin. **B)**  
 574 Number of genes differentially expressed between control and sleep deprived treatments. Above  
 575 zero is upregulated in sleep deprived samples and below zero is downregulated in sleep deprived  
 576 samples. Light grey = shared with at least one other population, Dark grey = not shared among  
 577 other populations. Overall few genes are differentially expressed in response to sleep deprivation  
 578 and differentially expressed genes are not shared among populations. **C)** Venn-diagram of  
 579 overlap in differentially upregulated genes in the sleep deprivation treatment between all four  
 580 populations. **D)** Venn-diagram of overlap in differentially downregulated genes in the sleep  
 581 deprivation treatment across all four populations.  
 582

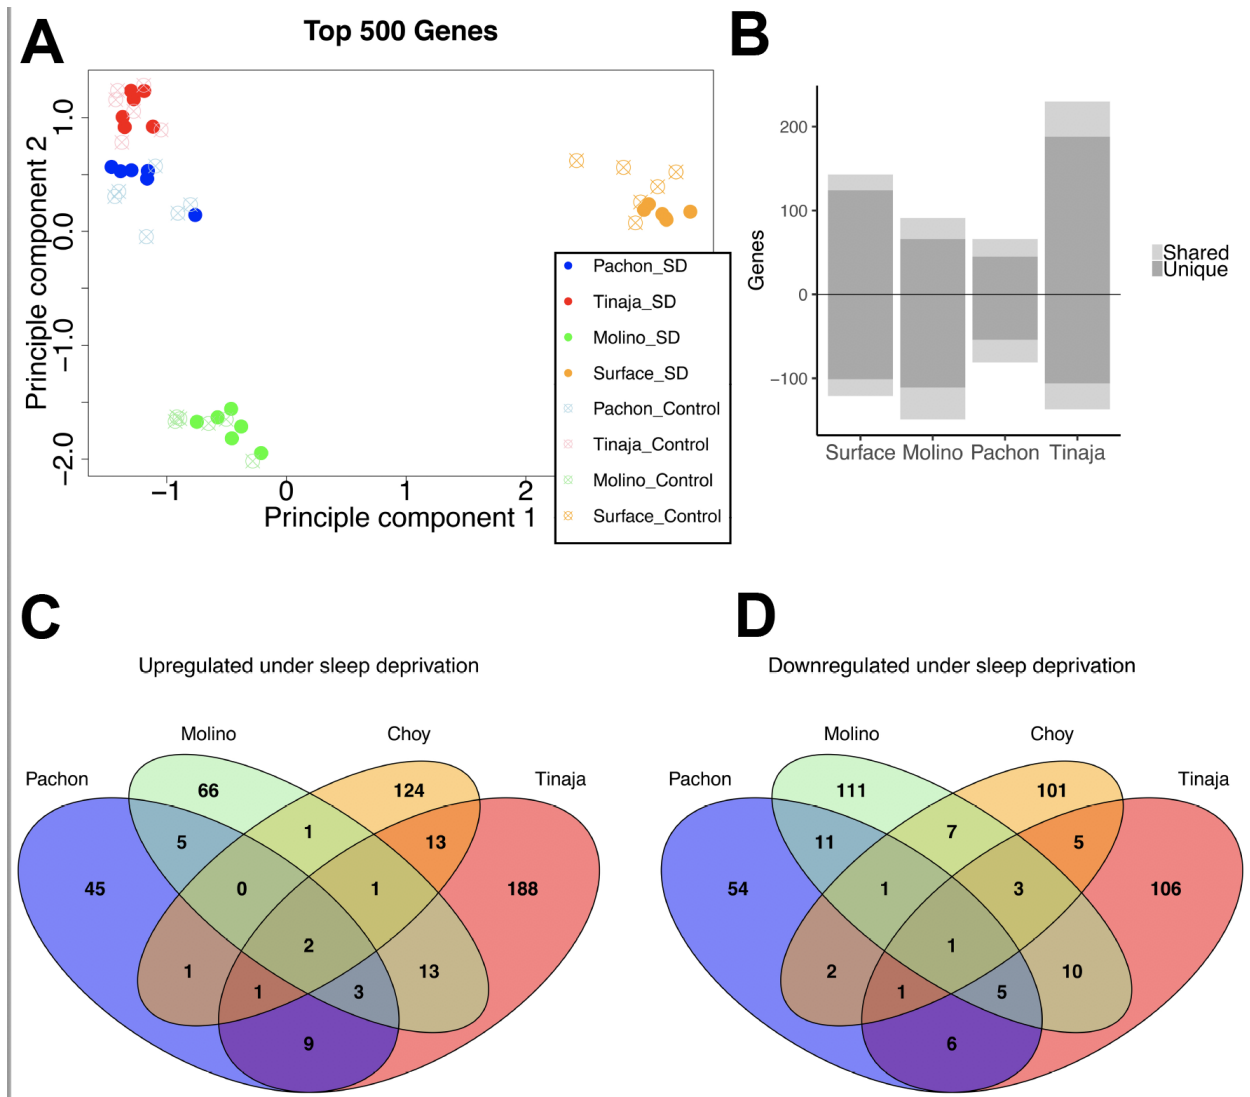

583  
 584  
 585  
 586

587 **Table 1. Summary statistics of samples and sequencing.** Standard deviation follows the mean number of raw reads (in millions).  
 588 Upregulated and downregulated are given as population specific/total differentially expressed genes after correction for multiple  
 589 testing. The percent that follows pertains to population specific genes.

| 590 |                               |          | <b>Mean #</b>    |                    |                      |
|-----|-------------------------------|----------|------------------|--------------------|----------------------|
| 591 | <b>Population - Treatment</b> | <b>N</b> | <b>Raw Reads</b> | <b>upregulated</b> | <b>downregulated</b> |
| 592 | Surface - sleep deprived      | 6        | 16.90±0.52       | 124/143 (86.7%)    | 101/121 (83.5%)      |
| 593 | Surface - control             | 6        | 17.18±1.84       |                    |                      |
| 594 |                               |          |                  |                    |                      |
| 595 |                               |          |                  |                    |                      |
| 596 | Molino cave - sleep deprived  | 6        | 17.91±1.07       | 66/91 (72.5%)      | 111/149 (74.5%)      |
| 597 | Molino cave - control         | 6        | 16.48±1.75       |                    |                      |
| 598 |                               |          |                  |                    |                      |
| 599 | Pachón cave - sleep deprived  | 6        | 17.45±1.45       | 45/66 (68.2%)      | 54/81 (66.17)        |
| 600 | Pachón cave - control         | 6        | 17.31±1.06       |                    |                      |
| 601 |                               |          |                  |                    |                      |
| 602 | Tinaja cave - sleep deprived  | 6        | 14.76±0.60       | 188/230 (81.7%)    | 106/137 (77.4%)      |
| 603 | Tinaja cave - control         | 6        | 15.75±1.26       |                    |                      |
| 604 |                               |          |                  |                    |                      |
| 605 |                               |          |                  |                    |                      |

606 **Data availability statement:**

607 All RNAseq reads are available on the SRA (Accession numbers given in Table S1).  
608 Raw expression counts data are given as a supplementary file.

609

610 **References**

- 611 Aho, V., Ollila, H. M., Rantanen, V., Kronholm, E., Surakka, I., van Leeuwen, W. M., . . . Härmä,  
612 M. (2013). Partial sleep restriction activates immune response-related gene expression  
613 pathways: experimental and epidemiological studies in humans. *PloS one*, 8(10),  
614 e77184.
- 615 Aho, V., Vainikka, M., Puttonen, H. A., Ikonen, H. M., Salminen, T., Panula, P., . . . Wigren, H.  
616 K. (2017). Homeostatic response to sleep/rest deprivation by constant water flow in  
617 larval zebrafish in both dark and light conditions. *Journal of sleep research*, 26(3), 394-  
618 400.
- 619 Alie, A., Devos, L., Torres-Paz, J., Prunier, L., Boulet, F., Blin, M., . . . Retaux, S. (2018).  
620 Developmental evolution of the forebrain in cavefish, from natural variations in  
621 neuropeptides to behavior. *eLife*, 7, e32808.
- 622 Allada, R., Cirelli, C., & Sehgal, A. (2017). Molecular mechanisms of sleep homeostasis in flies  
623 and mammals. *Cold Spring Harbor perspectives in biology*, 9(8), a027730.
- 624 Anafi, R. C., Kayser, M. S., & Raizen, D. M. (2018). Exploring phylogeny to find the function of  
625 sleep. *Nature Reviews Neuroscience*, 1.
- 626 Andrews, S. (2014). FastQC: a quality control tool for high throughput sequence data. Version  
627 0.11.2. *Babraham Institute, Cambridge, UK*  
628 <http://www.bioinformatics.babraham.ac.uk/projects/fastqc>.
- 629 Archer, S. N., Laing, E. E., Moller-Levet, C. S., van der Veen, D. R., Bucca, G., Lazar, A. S., . . .  
630 Dijk, D. J. (2014). Mistimed sleep disrupts circadian regulation of the human  
631 transcriptome. *Proceedings of the National Academy of Sciences USA*, 111(6), E682-  
632 691. doi:10.1073/pnas.1316335111
- 633 Archer, S. N., & Oster, H. (2015). How sleep and wakefulness influence circadian rhythmicity:  
634 effects of insufficient and mistimed sleep on the animal and human transcriptome.  
635 *Journal of sleep research*, 24(5), 476-493. doi:10.1111/jsr.12307
- 636 Aspiras, A. C., Rohner, N., Martineau, B., Borowsky, R. L., & Tabin, C. J. (2015). *Melanocortin 4*  
637 *receptor* mutations contribute to the adaptation of cavefish to nutrient-poor conditions.  
638 *Proceedings of the National Academy of Sciences*, 112(31), 9668-9673.
- 639 Beale, A., Guibal, C., Tamai, T. K., Klotz, L., Cowen, S., Peyric, E., . . . Whitmore, D. (2013).  
640 Circadian rhythms in Mexican blind cavefish *Astyanax mexicanus* in the lab and in the  
641 field. *Nature communications*, 4, 2769-2769. doi:10.1038/ncomms3769
- 642 Blask, D. E. (2009). Melatonin, sleep disturbance and cancer risk. *Sleep medicine reviews*,  
643 13(4), 257-264.
- 644 Bolger, A. M., Lohse, M., & Usadel, B. (2014). Trimmomatic: A flexible trimmer for Illumina  
645 sequence data. *Bioinformatics*, 30(15), 2114-2120. doi:10.1093/bioinformatics/btu170
- 646 Borbély, A. A., Daan, S., Wirz-Justice, A., & Deboer, T. (2016). The two-process model of sleep  
647 regulation: a reappraisal. *Journal of sleep research*, 25(2), 131-143.
- 648 Borowsky, R. (2008). *Astyanax mexicanus*, the blind Mexican cave fish: A model for studies in  
649 development and morphology. *Cold Spring Harbor Protocols*, 2008(11), pdb. emo107.
- 650 Bradic, M., Beerli, P., Garcia-de Leon, F. J., Esquivel-Bobadilla, S., & Borowsky, R. L. (2012).  
651 Gene flow and population structure in the Mexican blind cavefish complex (*Astyanax*  
652 *mexicanus*). *BMC evolutionary biology*, 12(1), 9.
- 653 Cappuccio, F. P., D'elia, L., Strazzullo, P., & Miller, M. A. (2010). Quantity and quality of sleep  
654 and incidence of type 2 diabetes: a systematic review and meta-analysis. *Diabetes care*,  
655 33(2), 414-420.



- 656 Cedernaes, J., Schönke, M., Westholm, J. O., Mi, J., Chibalin, A., Voisin, S., . . . Dickson, S. L.  
657 (2018). Acute sleep loss results in tissue-specific alterations in genome-wide DNA  
658 methylation state and metabolic fuel utilization in humans. *Science advances*, 4(8),  
659 eaar8590.
- 660 Cirelli, C., Faraguna, U., & Tononi, G. (2006). Changes in brain gene expression after long-term  
661 sleep deprivation. *Journal of neurochemistry*, 98(5), 1632-1645.
- 662 Coghill, L. M., Hulsey, C. D., Chaves-Campos, J., García de Leon, F. J., & Johnson, S. G.  
663 (2014). Next generation phylogeography of cave and surface *Astyanax mexicanus*.  
664 *Molecular Phylogenetics and Evolution*, 79, 368-374.
- 665 Conde, J., Otero, M., Scotece, M., Abella, V., López, V., Pino, J., . . . Gualillo, O. (2016). E74-  
666 like factor 3 and nuclear factor- $\kappa$ B regulate lipocalin-2 expression in chondrocytes. *The*  
667 *Journal of physiology*, 594(21), 6133-6146.
- 668 Cruickshank, T. E., & Hahn, M. W. (2014). Reanalysis suggests that genomic islands of  
669 speciation are due to reduced diversity, not reduced gene flow. *Molecular ecology*, 23,  
670 3133–3157.
- 671 Curie, T., Maret, S., Emmenegger, Y., & Franken, P. (2015). In vivo imaging of the central and  
672 peripheral effects of sleep deprivation and suprachiasmatic nuclei lesion on PERIOD-2  
673 protein in mice. *Sleep*, 38(9), 1381-1394.
- 674 Davies, S. K., Ang, J. E., Revell, V. L., Holmes, B., Mann, A., Robertson, F. P., . . . Skene, D. J.  
675 (2014). Effect of sleep deprivation on the human metabolome. *Proceedings of the*  
676 *National Academy of Sciences USA*, 111(29), 10761-10766.  
677 doi:10.1073/pnas.1402663111
- 678 Dickinson, M. E., Flenniken, A. M., Ji, X., Teboul, L., Wong, M. D., White, J. K., . . . Adissu, H.  
679 (2016). High-throughput discovery of novel developmental phenotypes. *Nature*,  
680 537(7621), 508.
- 681 Diessler, S., Jan, M., Emmenegger, Y., Guex, N., Middleton, B., Skene, D. J., . . . Pagni, M.  
682 (2018). A systems genetics resource and analysis of sleep regulation in the mouse.  
683 *PLoS biology*, 16(8), e2005750.
- 684 Dobin, A., Davis, C. A., Schlesinger, F., Drenkow, J., Zaleski, C., Jha, S., . . . Gingeras, T. R.  
685 (2013). STAR: ultrafast universal RNA-seq aligner. *Bioinformatics*, 29(1), 15-21.
- 686 Duboué, E. R., Borowsky, R. L., & Keene, A. C. (2012).  $\beta$ -adrenergic signaling regulates  
687 evolutionarily derived sleep loss in the mexican cavefish. *Brain, Behavior, and Evolution*,  
688 80, 233-243. doi:10.1159/000341403
- 689 Duboué, E. R., Keene, A. C., & Borowsky, R. L. (2011). Evolutionary convergence on sleep loss  
690 in cavefish populations. *Current Biology*, 21(8), 671-676. doi:10.1016/j.cub.2011.03.020
- 691 Elbaz, I., Zada, D., Tovin, A., Braun, T., Lerer-Goldshtein, T., Wang, G., . . . Appelbaum, L.  
692 (2017). Sleep-dependent structural synaptic plasticity of inhibitory synapses in the  
693 dendrites of hypocretin/orexin neurons. *Molecular neurobiology*, 54(8), 6581-6597.
- 694 Elliott, A. S., Huber, J. D., O'Callaghan, J. P., Rosen, C. L., & Miller, D. B. (2014). A review of  
695 sleep deprivation studies evaluating the brain transcriptome. *SpringerPlus*, 3(1), 728.
- 696 Espinasa, L., Rivas-Manzano, P., & Pérez, H. E. (2001). A new blind cave fish population of  
697 genus *Astyanax*: geography, morphology and behavior. *Environmental Biology of*  
698 *Fishes*, 62(1-3), 339-344.
- 699 Fariello, M. I., Boitard, S., Naya, H., SanCristobal, M., & Servin, B. (2013). Detecting signatures  
700 of selection through haplotype differentiation among hierarchically structured  
701 populations. *Genetics*, 193(3), 929-941.
- 702 Franken, P. (2013). A role for clock genes in sleep homeostasis. *Current opinion in*  
703 *neurobiology*, 23, 864-872.
- 704 Gajulapalli, V. N. R., Samanthapudi, V. S. K., Pulaganti, M., Khumukcham, S. S., Malisetty, V.  
705 L., Guruprasad, L., . . . Manavathi, B. (2016). A transcriptional repressive role for

- 706 epithelial-specific ETS factor ELF3 on oestrogen receptor alpha in breast cancer cells.  
707 *Biochemical Journal*, 473(8), 1047-1061.
- 708 Gross, J. B., Furterer, A., Carlson, B. M., & Stahl, B. A. (2013). An integrated transcriptome-  
709 wide analysis of cave and surface dwelling *Astyanax mexicanus*. *PloS one*, 8(2),  
710 e55659.
- 711 Han, F., Lin, L., Li, J., Aran, A., Dong, S. X., An, P., . . . Wang, J. S. (2012). TCRA, P2RY11,  
712 and CPT1B/CHKB associations in Chinese narcolepsy. *Sleep medicine*, 13(3), 269-272.
- 713 Haus, E. L., & Smolensky, M. H. (2013). Shift work and cancer risk: potential mechanistic roles  
714 of circadian disruption, light at night, and sleep deprivation. *Sleep medicine reviews*,  
715 17(4), 273-284.
- 716 Herman, A., Brandvain, Y., Weagley, J., Jeffery, W. R., Keene, A. C., Kono, T. J. Y., . . .  
717 McGaugh, S. E. (2018). The role of gene flow in rapid and repeated evolution of cave  
718 related traits in Mexican tetra, *Astyanax mexicanus*. *Molecular ecology*, 27, 4397– 4416
- 719 Hinaux, H., Poulain, J., Da Silva, C., Noirot, C., Jeffery, W. R., Casane, D., & Retaux, S. (2013).  
720 De novo sequencing of *Astyanax mexicanus* surface fish and Pachón cavefish  
721 transcriptomes reveals enrichment of mutations in cavefish putative eye genes. *PloS*  
722 *one*, 8, e53553.
- 723 Holst, S. C., & Landolt, H.-P. (2015). Sleep homeostasis, metabolism, and adenosine. *Current*  
724 *Sleep Medicine Reports*, 1(1), 27-37.
- 725 Homan, E. A., Kim, Y.-G., Cardia, J. P., & Saghatelian, A. (2011). Monoalkylglycerol ether lipids  
726 promote adipogenesis. *Journal of the American Chemical Society*, 133(14), 5178-5181.
- 727 Igarashi, M., Osuga, J.-i., Uozaki, H., Sekiya, M., Nagashima, S., Takahashi, M., . . . Ohta, K.  
728 (2010). The critical role of neutral cholesterol ester hydrolase 1 in cholesterol removal  
729 from human macrophages. *Circulation research*, 107(11), 1387-1395.
- 730 Jaggard, J. B., Lloyd, E., Lopatto, A., Duboue, E. R., & Keene, A. C. (2019). Automated  
731 measurements of sleep and locomotor activity in Mexican cavefish. *JoVE (Journal of*  
732 *Visualized Experiments)*(145), e59198.
- 733 Jaggard, J. B., Robinson, B. G., Stahl, B. A., Oh, I., Masek, P., Yoshizawa, M., & Keene, A. C.  
734 (2017). The lateral line confers evolutionarily derived sleep loss in the Mexican cavefish.  
735 *Journal of Experimental Biology*, 220, 284-293.
- 736 Jaggard, J. B., Stahl, B. A., Lloyd, E., Prober, D. A., Duboue, E. R., & Keene, A. C. (2018).  
737 Hypocretin underlies the evolution of sleep loss in the Mexican cavefish. *eLife*, 7,  
738 e32637.
- 739 Joiner, W. J. (2016). Unraveling the evolutionary determinants of sleep. *Current Biology*, 26(20),  
740 R1073-R1087.
- 741 Keene, A., Yoshizawa, M., & McGaugh, S. E. (2015). *Biology and Evolution of the Mexican*  
742 *Cavefish*: Elsevier: Academic Press.
- 743 Keene, A. C., & Duboue, E. R. (2018). The origins and evolution of sleep. *Journal of*  
744 *Experimental Biology*, 221(11), jeb159533.
- 745 Kim, J., Okamoto, H., Huang, Z., Anguiano, G., Chen, S., Liu, Q., . . . Hamid, R. (2017). Amino  
746 acid transporter Slc38a5 controls glucagon receptor inhibition-induced pancreatic  $\alpha$  cell  
747 hyperplasia in mice. *Cell metabolism*, 25(6), 1348-1361. e1348.
- 748 Kwon, M.-c., Koo, B.-K., Kim, Y.-Y., Lee, S.-H., Kim, N.-S., Kim, J.-H., & Kong, Y.-Y. (2009).  
749 Essential role of CR6-interacting factor 1 (Crif1) in E74-like factor 3 (ELF3)-mediated  
750 intestinal development. *Journal of Biological Chemistry*, 284(48), 33634-33641.
- 751 Lane, J. M., Liang, J., Vlasac, I., Anderson, S. G., Bechtold, D. A., Bowden, J., . . . Luik, A. I.  
752 (2017). Genome-wide association analyses of sleep disturbance traits identify new loci  
753 and highlight shared genetics with neuropsychiatric and metabolic traits. *Nature*  
754 *genetics*, 49(2), 274.

- 755 Leproult, R., Holmbäck, U., & Van Cauter, E. (2014). Circadian misalignment augments markers  
756 of insulin resistance and inflammation, independently of sleep loss. *Diabetes*,  
757 DB\_131546.
- 758 Levy, P., Tamisier, R., Arnaud, C., Monneret, D., Baguet, J., Stanke-Labesque, F., . . . Pepin, J.  
759 (2012). Sleep deprivation, sleep apnea and cardiovascular diseases. *Frontiers in*  
760 *bioscience (Elite edition)*, 4, 2007-2021.
- 761 Libourel, P.-A., Barrillot, B., Arthaud, S., Massot, B., Morel, A.-L., Beuf, O., . . . Luppi, P.-H.  
762 (2018). Partial homologies between sleep states in lizards, mammals, and birds suggest  
763 a complex evolution of sleep states in amniotes. *PLoS biology*, 16(10), e2005982.
- 764 Liu, S., Croniger, C., Arizmendi, C., Harada-Shiba, M., Ren, J., Poli, V., . . . Friedman, J. E.  
765 (1999). Hypoglycemia and impaired hepatic glucose production in mice with a deletion of  
766 the C/EBP $\beta$  gene. *The journal of clinical Investigation*, 103(2), 207-213.
- 767 Liu, S., Liu, Q., Tabuchi, M., & Wu, M. N. (2016). Sleep drive is encoded by neural plastic  
768 changes in a dedicated circuit. *Cell*, 165(6), 1347-1360.
- 769 Ma, L., Strickler, A. G., Parkhurst, A., Yoshizawa, M., Shi, J., & Jeffery, W. R. (2018). Maternal  
770 genetic effects in *Astyanax* cavefish development. *Developmental Biology*, 441(2), 209-  
771 220.
- 772 Mackiewicz, M., Shockley, K. R., Romer, M. A., Galante, R. J., Zimmerman, J. E., Naidoo, N., . .  
773 . Pack, A. I. (2007). Macromolecule biosynthesis: a key function of sleep. *Physiological*  
774 *Genomics*, 31(3), 441-457.
- 775 Mackiewicz, M., Zimmerman, J. E., Shockley, K. R., Churchill, G. A., & Pack, A. I. (2009). What  
776 are microarrays teaching us about sleep? *Trends in Molecular Medicine*, 15(2), 79-87.  
777 doi:10.1016/j.molmed.2008.12.002
- 778 McGaugh, S. E., Gross, J. B., Aken, B., Blin, M., Borowsky, R., Chalopin, D., . . . Warren, W. C.  
779 (2014). The cavefish genome reveals candidate genes for eye loss. *Nature*  
780 *communications*, 5, 5307-5307.
- 781 Miyagawa, T., Kawashima, M., Nishida, N., Ohashi, J., Kimura, R., Fujimoto, A., . . . Lin, L.  
782 (2008). Variant between CPT1B and CHKB associated with susceptibility to narcolepsy.  
783 *Nature genetics*, 40(11), 1324.
- 784 Möller-Levet, C. S., Archer, S. N., Bucca, G., Laing, E. E., Slak, A., Kabiljo, R., . . . Smith, C. P.  
785 (2013). Effects of insufficient sleep on circadian rhythmicity and expression amplitude of  
786 the human blood transcriptome. *Proceedings of the National Academy of Sciences*,  
787 110(12), E1132-E1141.
- 788 Nakazaki, C., Noda, A., Koike, Y., Yamada, S., Murohara, T., & Ozaki, N. (2012). Association of  
789 insomnia and short sleep duration with atherosclerosis risk in the elderly. *American*  
790 *journal of hypertension*, 25(11), 1149-1155.
- 791 Nath, R. D., Bedbrook, C. N., Abrams, M. J., Basinger, T., Bois, J. S., Prober, D. A., . . .  
792 Goentoro, L. (2017). The jellyfish *Cassiopea* exhibits a sleep-like state. *Current Biology*,  
793 27(19), 2984-2990. e2983.
- 794 Obholzer, N., Wolfson, S., Trapani, J. G., Mo, W., Nechiporuk, A., Busch-Nentwich, E., . . .  
795 Duncan, R. N. (2008). Vesicular glutamate transporter 3 is required for synaptic  
796 transmission in zebrafish hair cells. *Journal of Neuroscience*, 28(9), 2110-2118.
- 797 Okazaki, H., Igarashi, M., Nishi, M., Sekiya, M., Tajima, M., Takase, S., . . . Okazaki, S. (2008).  
798 Identification of neutral cholesterol ester hydrolase, a key enzyme removing cholesterol  
799 from macrophages. *Journal of Biological Chemistry*, 283(48), 33357-33364.
- 800 Passow, C. N., Kono, T. J., Stahl, B. A., Jaggard, J. B., Keene, A. C., & McGaugh, S. E. (2019).  
801 Nonrandom RNAseq gene expression associated with RNAlater and flash freezing  
802 storage methods. *Molecular Ecology Resources*, 19(2), 456-464.
- 803 Pellegrino, R., Sunaga, D. Y., Guindalini, C., Martins, R. C., Mazzotti, D. R., Wei, Z., . . . Tufik,  
804 S. (2012). Whole blood genome-wide gene expression profile in males after prolonged  
805 wakefulness and sleep recovery. *Physiological Genomics*, 44(21), 1003-1012.

- 806 Perteua, M., Kim, D., Perteua, G. M., Leek, J. T., & Salzberg, S. L. (2016). Transcript-level  
807 expression analysis of RNA-seq experiments with HISAT, StringTie and Ballgown.  
808 *Nature protocols*, 11(9), 1650.
- 809 Perteua, M., Perteua, G. M., Antonescu, C. M., Chang, T.-C., Mendell, J. T., & Salzberg, S. L.  
810 (2015). StringTie enables improved reconstruction of a transcriptome from RNA-seq  
811 reads. *Nature biotechnology*, 33(3), 290.
- 812 Pinheiro-da-Silva, J., Silva, P. F., Nogueira, M. B., & Luchiari, A. C. (2017). Sleep deprivation  
813 effects on object discrimination task in zebrafish (*Danio rerio*). *Animal cognition*, 20(2),  
814 159-169.
- 815 Podobed, P. S., Alibhai, F. J., Chow, C.-W., & Martino, T. A. (2014). Circadian regulation of  
816 myocardial sarcomeric Titin-cap (Tcap, telethonin): identification of cardiac clock-  
817 controlled genes using open access bioinformatics data. *PloS one*, 9(8), e104907.
- 818 Prober, D. A. (2018). Discovery of hypocretin/orexin ushers in a new era of sleep research.  
819 *Trends in neurosciences*, 41(2), 70-72.
- 820 Rao, M. N., Neylan, T. C., Grunfeld, C., Mulligan, K., Schambelan, M., & Schwarz, J.-M. (2015).  
821 Subchronic sleep restriction causes tissue-specific insulin resistance. *The Journal of*  
822 *Clinical Endocrinology & Metabolism*, 100(4), 1664-1671.
- 823 Riddle, M. R., Aspiras, A. C., Gaudenz, K., Peuß, R., Sung, J. Y., Martineau, B., . . . McGaugh,  
824 S. (2018). Insulin resistance in cavefish as an adaptation to a nutrient-limited  
825 environment. *Nature*, 555(7698), 647.
- 826 Rihel, J., Prober, D. A., & Schier, A. F. (2010). Monitoring sleep and arousal in zebrafish. In  
827 *Methods in Cell Biology* (Vol. 100, pp. 281-294): Elsevier.
- 828 Robinson, M. D., McCarthy, D. J., & Smyth, G. K. (2010). edgeR: a Bioconductor package for  
829 differential expression analysis of digital gene expression data. *Bioinformatics*, 26(1),  
830 139-140.
- 831 Schlamp, F., Van Der Made, J., Stambler, R., Chesebrough, L., Boyko, A. R., & Messer, P. W.  
832 (2016). Evaluating the performance of selection scans to detect selective sweeps in  
833 domestic dogs. *Molecular ecology*, 25(1), 342-356. doi:10.1111/mec.13485
- 834 Shatnawi, A., Norris, J., Chaveroux, C., Jasper, J., Sherk, A., McDonnell, D., & Giguere, V.  
835 (2014). ELF3 is a repressor of androgen receptor action in prostate cancer cells.  
836 *Oncogene*, 33(7), 862.
- 837 Stahl, B. A., & Gross, J. B. (2017). A comparative transcriptomic analysis of development in two  
838 *Astyanax* cavefish populations. *Journal of Experimental Zoology Part B: Molecular and*  
839 *Developmental Evolution*, 328, 515-532.
- 840 Stahl, B. A., Peuß, R., McDole, B., Kenzior, A., Jaggard, J. B., Gaudenz, K., . . . Keene, A. C.  
841 (2019). Stable transgenesis in *Astyanax mexicanus* using the Tol2 transposase system.  
842 *Developmental Dynamics*.
- 843 Toyama, R., Chen, X., Jhavar, N., Amar, E., Epstein, J., Reany, N., . . . Dawid, I. B. (2009).  
844 Transcriptome analysis of the zebrafish pineal gland. *Developmental dynamics: an*  
845 *official publication of the American Association of Anatomists*, 238(7), 1813-1826.
- 846 Uyhelji, H. A., Kupfer, D. M., White, V. L., Jackson, M. L., Van Dongen, H. P., & Burian, D. M.  
847 (2018). Exploring gene expression biomarker candidates for neurobehavioral impairment  
848 from total sleep deprivation. *BMC genomics*, 19(1), 341.
- 849 Wang, J., Chakrabarty, S., Bui, Q., Ruf, W., & Samad, F. (2015). Hematopoietic tissue factor-  
850 protease-activated receptor 2 signaling promotes hepatic inflammation and contributes  
851 to pathways of gluconeogenesis and steatosis in obese mice. *The American journal of*  
852 *pathology*, 185(2), 524-535.
- 853 Yachida, S., Wood, L. D., Suzuki, M., Takai, E., Totoki, Y., Kato, M., . . . Hama, N. (2016).  
854 Genomic sequencing identifies ELF3 as a driver of ampullary carcinoma. *Cancer cell*,  
855 29(2), 229-240.

- 856 Yeung, T.-L., Leung, C. S., Wong, K.-K., Gutierrez-Hartmann, A., Kwong, J., Gershenson, D.  
857 M., & Mok, S. C. (2017). ELF3 is a negative regulator of epithelial-mesenchymal  
858 transition in ovarian cancer cells. *Oncotarget*, *8*(10), 16951.
- 859 Yoshizawa, M. (2015). Behaviors of cavefish offer insight into developmental evolution.  
860 *Molecular Reproduction and Development*, *82*(4), 268-280. doi:10.1002/mrd.22471
- 861 Yoshizawa, M., Robinson, B., Duboue, E. R., Masek, P., Jaggard, J. B., O'Quin, K. E., . . .  
862 Keene, A. C. (2015). Distinct genetic architecture underlies the emergence of sleep loss  
863 and prey-seeking behavior in the Mexican cavefish. *BMC Biology*, *13*(1), 1.
- 864 Yoshizawa, M., Settle, A., Hermosura, M. C., Tuttle, L. J., Cetraro, N., Passow, C. N., &  
865 McGaugh, S. E. (2018). The evolution of a series of behavioral traits is associated with  
866 autism-risk genes in cavefish. *BMC evolutionary biology*, *18*(1), 89.
- 867 Zada, D., Bronshtein, I., Lerer-Goldshtein, T., Garini, Y., & Appelbaum, L. (2019). Sleep  
868 increases chromosome dynamics to enable reduction of accumulating DNA damage in  
869 single neurons. *Nature communications*, *10*(1), 895.
- 870 Zhang, C., Kho, Y.-S., Wang, Z., Chiang, Y. T., Ng, G. K., Shaw, P.-C., . . . Qi, R. Z. (2014).  
871 Transmembrane and coiled-coil domain family 1 is a novel protein of the endoplasmic  
872 reticulum. *PloS one*, *9*(1), e85206.
- 873 Zhu, B., Shi, C., Park, C. G., Zhao, X., & Reutrakul, S. (2019). Effects of sleep restriction on  
874 metabolism-related parameters in healthy adults: A comprehensive review and meta-  
875 analysis of randomized controlled trials. *Sleep medicine reviews*, *45*, 18-30.
- 876

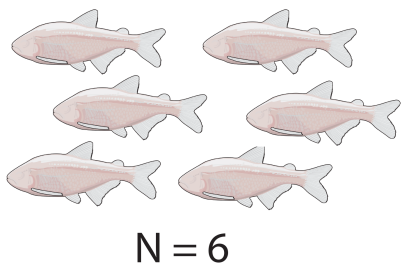

Sleep deprivation  
10 hrs during  
normal "night"

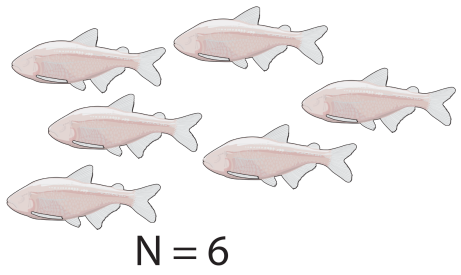

10 hrs  
normal "night"

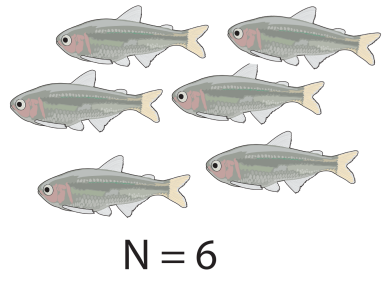

Sleep deprivation  
10 hrs during  
normal "night"

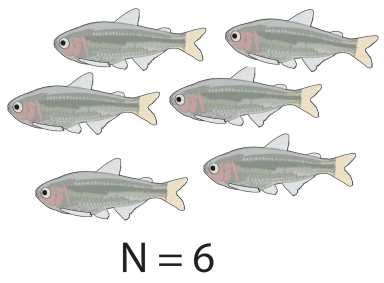

10 hrs  
normal "night"

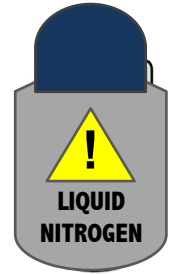

Flash freeze  
at 6am

Randomize extraction date  
Lane of sequencing

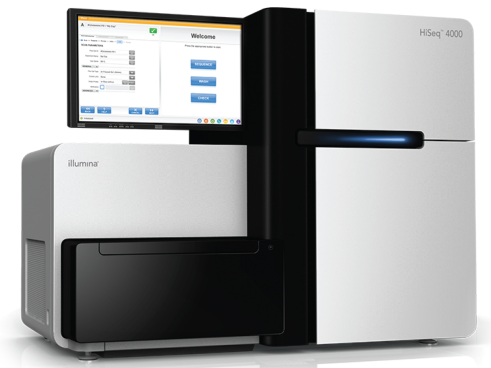

14.7-17.9 million reads/individual  
17,187 genes included  
post-filtering

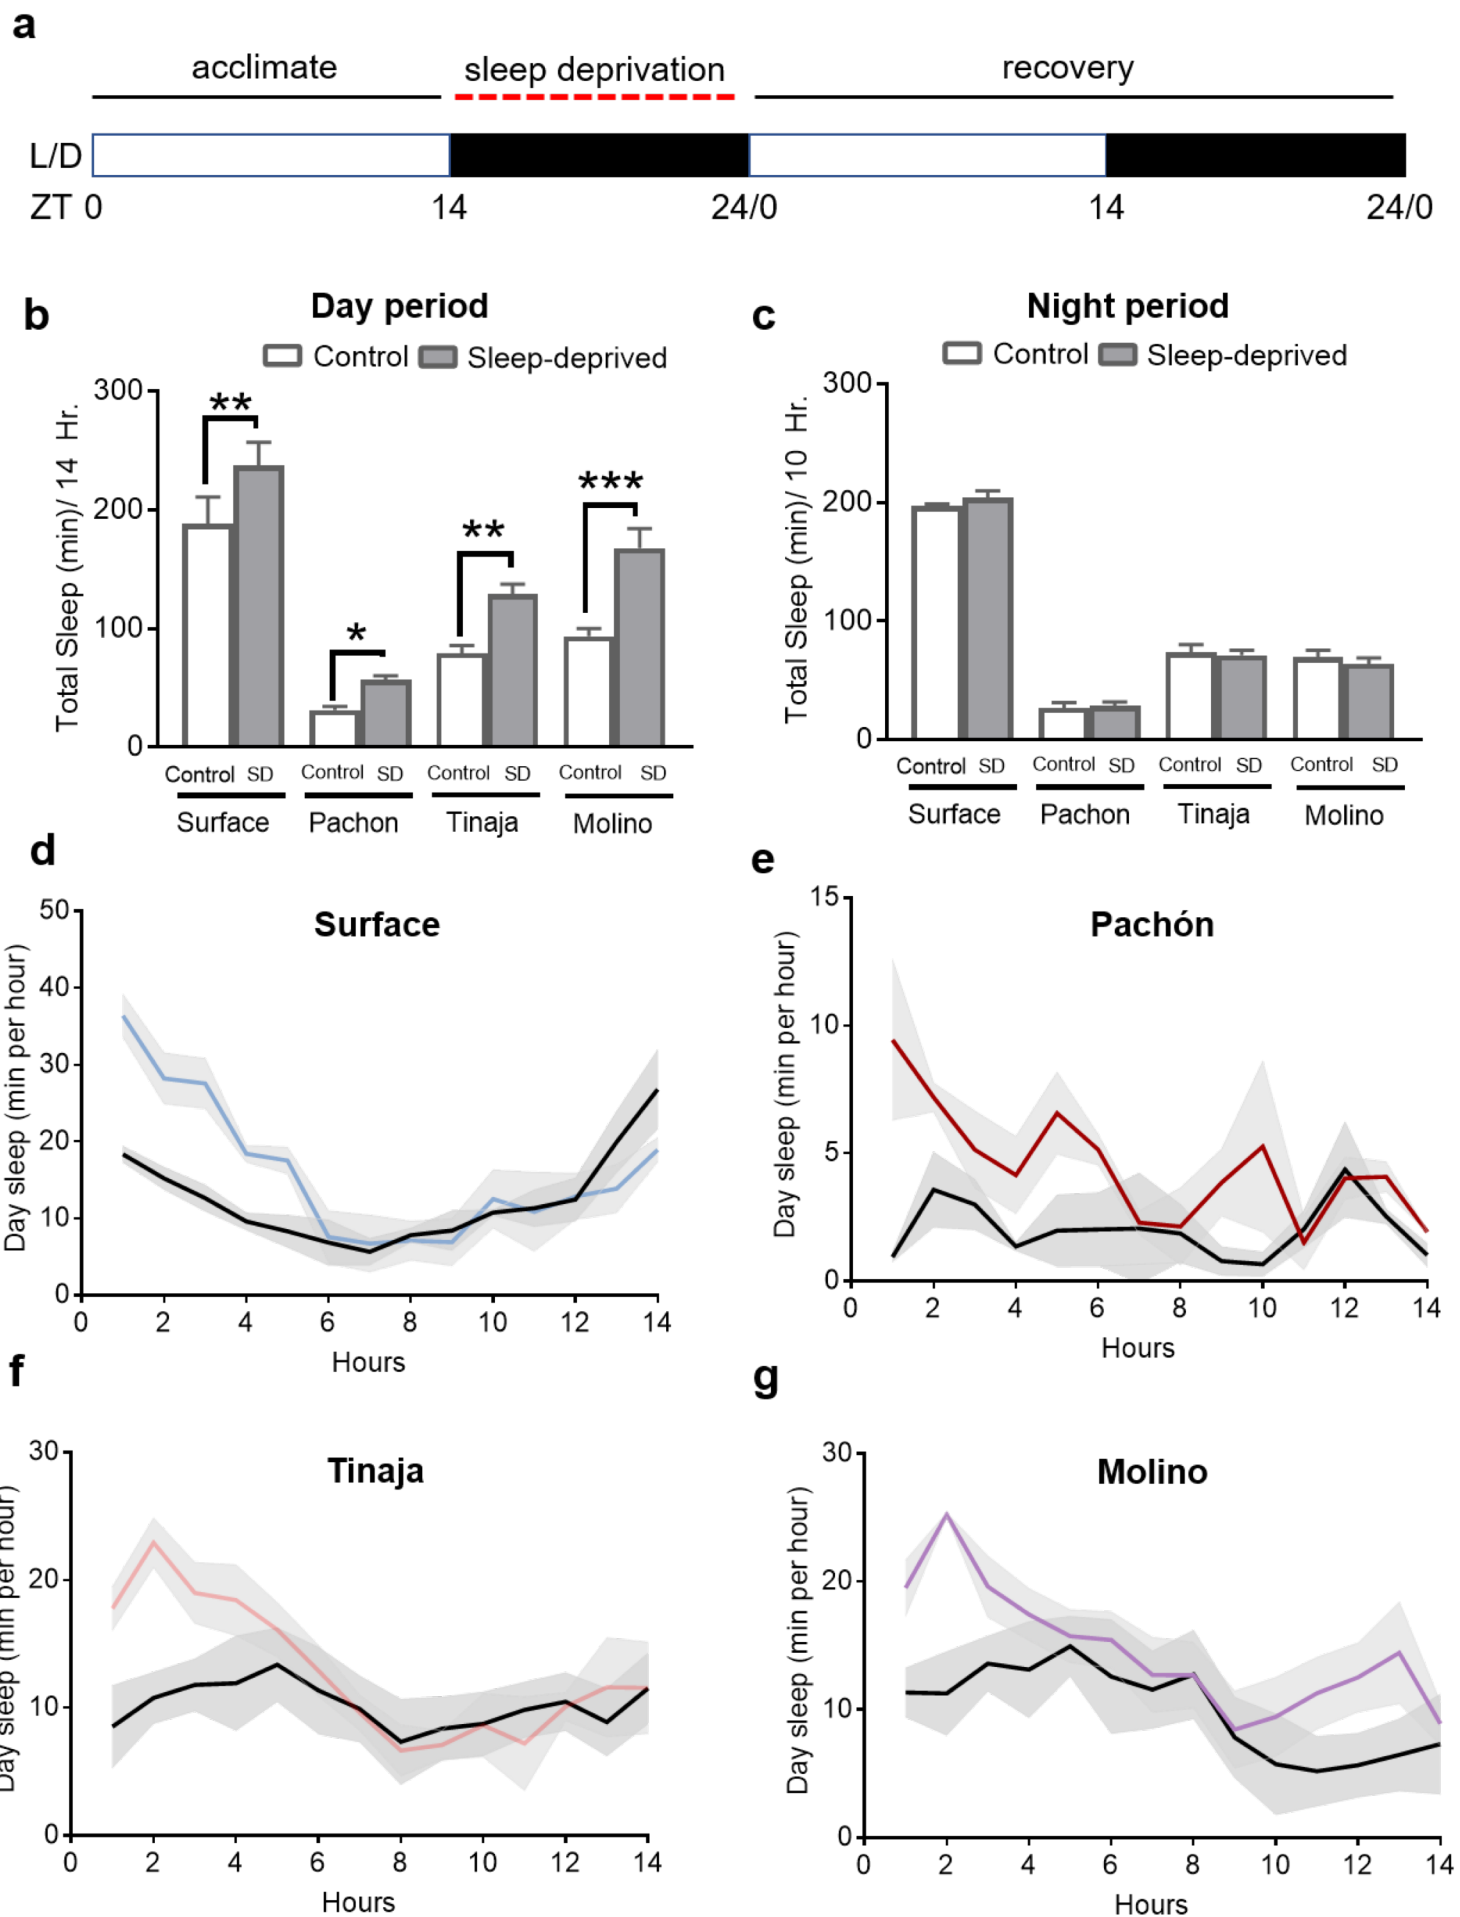

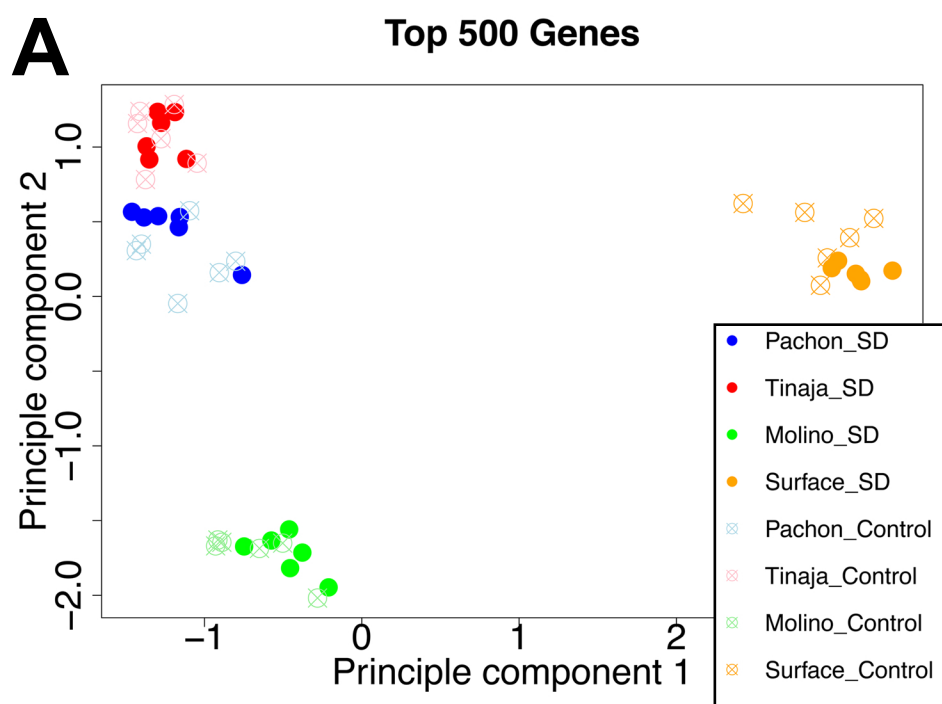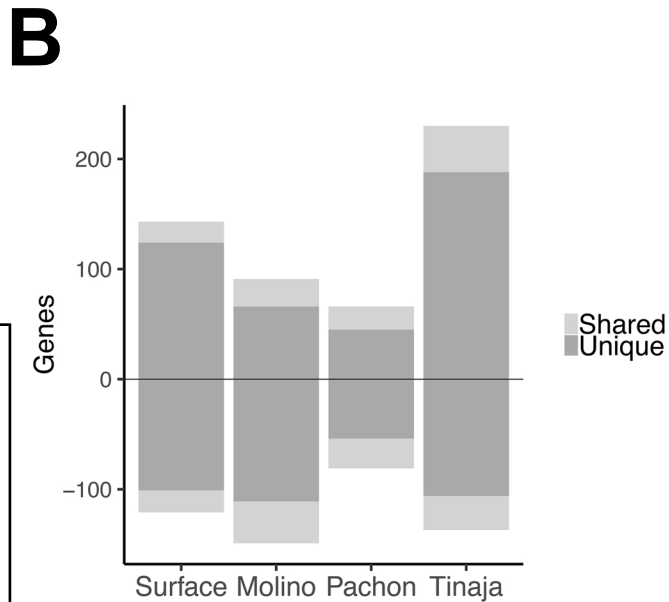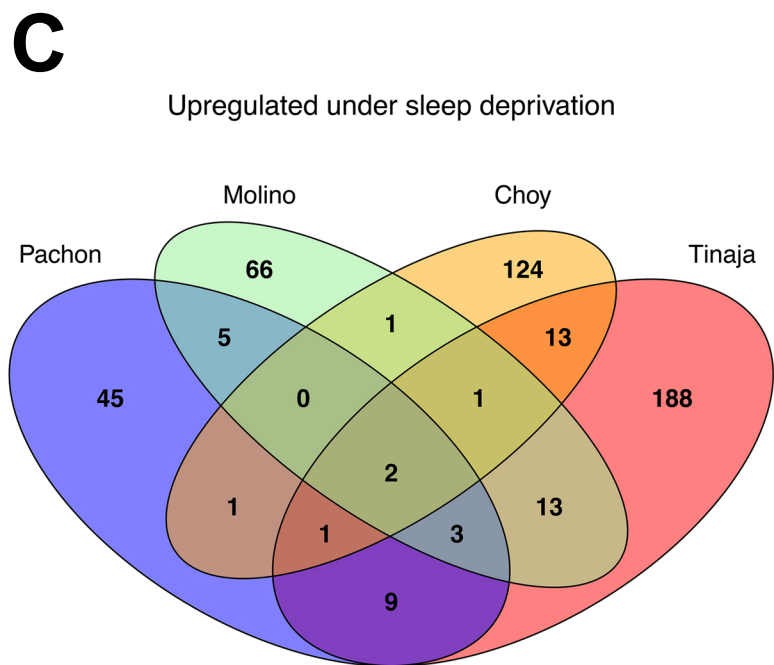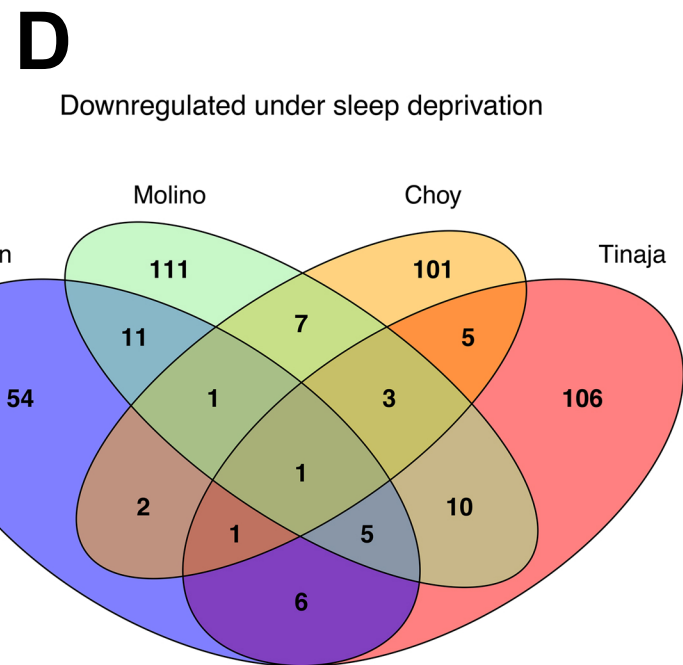

Source: https://www.biorxiv.org/content/10.1101/734673v1.full.pdf
